# Supplementary material for: Near-infrared persistent luminescence hollow mesoporous nanospheres for drug delivery and in vivo renewable imaging
Source: Royal Society of Chemistry journal article supplement (doi:10.1039/c6tb02674e), 2016-01-01
Supplement: c6tb02674e1.pdf [file c6tb02674e1.pdf]

## Supporting Information

# Near-Infrared Persistent Luminescence Hollow Mesoporous Nanospheres for Drug Delivery and *In Vivo* Renewable Imaging

*Junpeng Shi,<sup>a,b</sup> Meng Sun,<sup>a</sup> Xia Sun,<sup>a</sup> Hongwu Zhang<sup>\*a</sup>*

<sup>a</sup>Key Lab of Urban Pollutant Conversion, Institute of Urban Environment, Chinese  
Academy of Sciences, Xiamen 361021, China

<sup>b</sup>University of Chinese Academy of Sciences, Beijing 100049, China

\*Correspondence to Hongwu Zhang,

Email address: hwzhang@iue.ac.cn

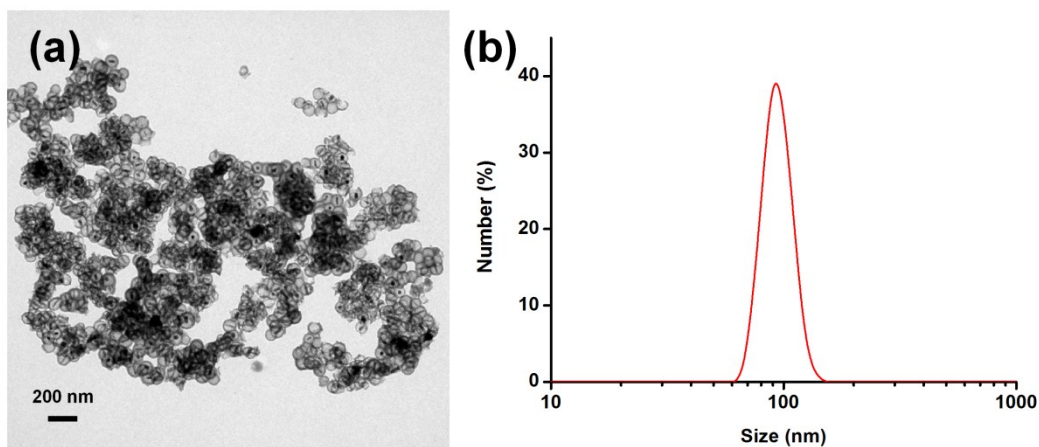

**Fig. S1** (a) TEM images of ZnGa<sub>2</sub>O<sub>4</sub>:Cr<sup>3+</sup>@HMS, (b) Dynamic light scattering spectrum of ZnGa<sub>2</sub>O<sub>4</sub>:Cr<sup>3+</sup>@HMS.

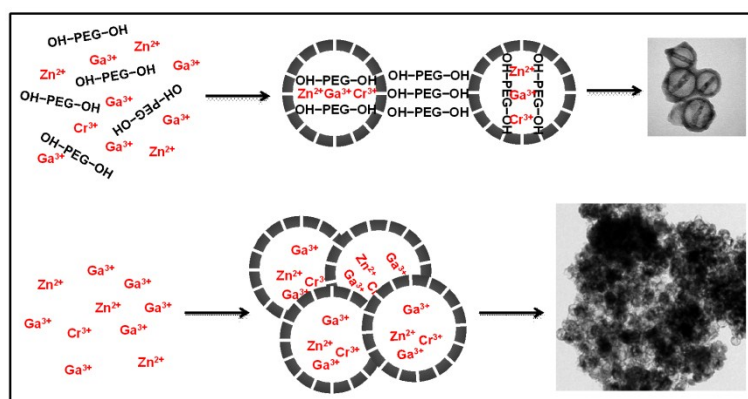

**Fig. S2** Schematic illustration of the preparation of the stick-shell structure.

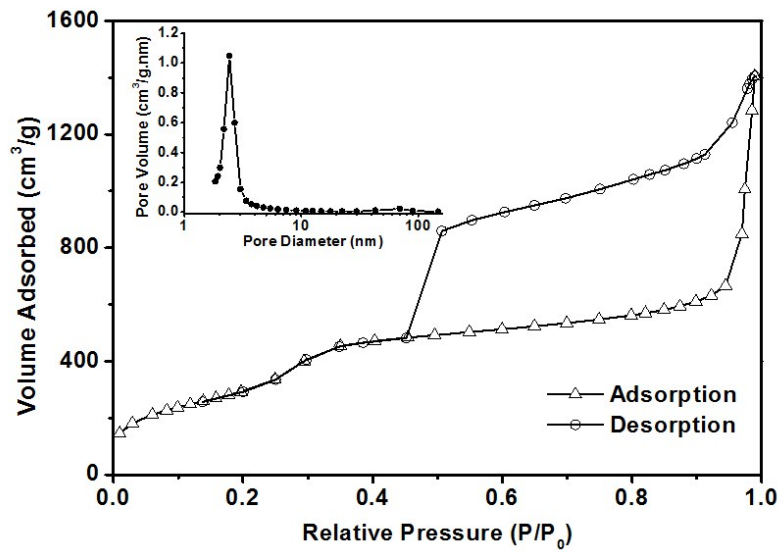

**Fig. S3** N<sub>2</sub> adsorption/desorption isotherms of HMS, the inset is the corresponding pore size distribution.
